# Supplementary material for: The influence of learning curve of robot‐assisted laparoscopy on oncological outcomes in early‐stage cervical cancer: an observational cohort study
Source: PubMed Central journal article supplement — BJOG. 2020 Jul 28;128(3):563–71. doi: 10.1111/1471-0528.16399 (PMC7818258; doi:10.1111/1471-0528.16399), 2020-07-28
Supplement: BJO-128-563-s002.pdf [file BJO-128-563-s002.pdf]

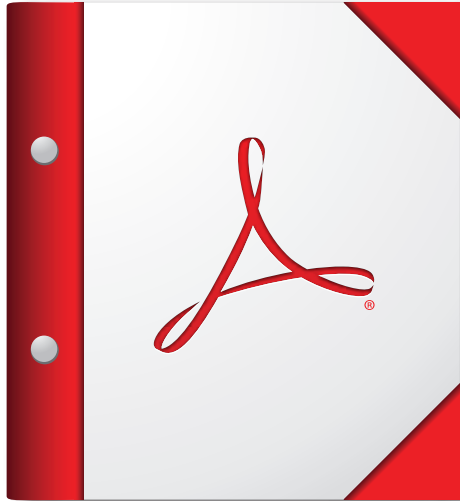

**Open voor de beste ervaring deze PDF-portfolio in  
Acrobat X of Adobe Reader X, of hoger.**

**Installeer Adobe Reader nu!**
